# Supplementary material
Source: PubMed Central journal article supplement (PMC5425096)
Supplement: NIHMS856388-supplement-supplement_1.pdf [file NIHMS856388-supplement-supplement_1.pdf]

Supplemental Table 1. Odds ratios (95% CI) of keratinocyte cancers in relation to duration of oral contraceptive use stratified by time since last use

|                                      | SCC               |                    |                            | BCC               |                    |                            | Early-onset                        |                                   |                            |
|--------------------------------------|-------------------|--------------------|----------------------------|-------------------|--------------------|----------------------------|------------------------------------|-----------------------------------|----------------------------|
|                                      | controls<br>N (%) | SCC cases<br>N (%) | OR (95% CI) <sup>b</sup>   | controls<br>N (%) | BCC cases<br>N (%) | OR (95% CI)                | BCC Controls <sup>a</sup><br>N (%) | Early-onset<br>BCC cases<br>N (%) | OR (95% CI)                |
| Non user                             | 307 (68.2)        | 270 (69.8)         | 1.0 (ref)                  | 236 (46.2)        | 200 (33.8)         | 1.0 (ref)                  | 49(21.7)                           | 57(16.7)                          | 1.0 (ref)                  |
| Years since last<br>OC use < 25 yrs. |                   |                    |                            |                   |                    |                            |                                    |                                   |                            |
| Duration of<br>OC Use                |                   |                    |                            |                   |                    |                            |                                    |                                   |                            |
| ≤ 2 yrs.                             | 34 (5.8)          | 11 (2.5)           | 1.3 (0.6-2.8)              | 34 (6.7)          | 47 (7.9)           | 1.4 (0.8-2.3)              | 32(14.2)                           | 44(12.9)                          | 1.2 (0.7-2.2)              |
| 3-6 yrs.                             | 69 (11.8)         | 17 (3.9)           | 0.8 (0.4-1.6)              | 69 (13.5)         | 91 (15.4)          | 1.3 (0.9-2.0)              | 61(27.0)                           | 80(23.4)                          | 1.1 (0.7-1.9)              |
| ≥ 7 yrs.                             | 110 (18.8)        | 49 (11.3)          | 1.1 (0.7-1.7)              | 108 (21.1)        | 170 (28.7)         | 1.7 (1.2-2.4)              | 69(30.5)                           | 130(38.0)                         | 1.6 (1.0-2.6)              |
| Continuous                           |                   |                    | p <sub>trend</sub> < 0.391 |                   |                    | p <sub>trend</sub> < 0.962 |                                    |                                   | p <sub>trend</sub> < 0.648 |
| Years since last<br>OC use ≥ 25 yrs. |                   |                    |                            |                   |                    |                            |                                    |                                   |                            |
| Duration of<br>OC Use                |                   |                    |                            |                   |                    |                            |                                    |                                   |                            |
| ≤ 2 yrs.                             | 36 (6.2)          | 36 (8.3)           | 1.7 (1.0-2.8)              | 36 (7.0)          | 40 (6.8)           | 1.2 (0.7-2.0)              | 12(5.3)                            | 19(5.6)                           | 1.3 (0.6-3.0)              |
| 3-6 yrs.                             | 19 (3.3)          | 28 (6.5)           | 2.6 (1.4-4.8)              | 19 (3.7)          | 32 (5.4)           | 1.7 (0.9-3.2)              | 3(1.3)                             | 11(3.2)                           | 3.2 (0.8-12.2)             |
| ≥ 7 yrs.                             | 9 (1.5)           | 21 (4.9)           | 3.0 (1.3-6.8)              | 9 (1.8)           | 12 (2.0)           | 1.7 (0.7-4.2)              |                                    |                                   | **                         |
| Continuous                           |                   |                    | p <sub>trend</sub> < 0.060 |                   |                    | p <sub>trend</sub> < 0.256 |                                    |                                   | p <sub>trend</sub> < 0.081 |

a. Early-onset BCC defined as age ≤ 50 at time of diagnosis.

b. Odds ratios and 95% confidence intervals adjusted for reference age and skin sensitivity to first solar exposure.

Supplemental Table 2. Odds ratios (95% CI) of keratinocyte cancers in relation to oral contraceptive use, hormone replacement therapy use, and combined use

|                          | SCC                          |                               |                          | BCC                          |                               |               | Early-onset BCC                           |                                              |               |
|--------------------------|------------------------------|-------------------------------|--------------------------|------------------------------|-------------------------------|---------------|-------------------------------------------|----------------------------------------------|---------------|
|                          | controls<br>N = 746<br>N (%) | SCC cases<br>N = 570<br>N (%) | OR (95% CI) <sup>b</sup> | controls<br>N = 550<br>N (%) | BCC cases<br>N = 633<br>N (%) | OR (95% CI)   | controls <sup>a</sup><br>N = 246<br>N (%) | Early-onset<br>BCC cases<br>N = 362<br>N (%) | OR (95% CI)   |
| Any estrogen hormone use |                              |                               |                          |                              |                               |               |                                           |                                              |               |
| Neither OC nor HRT use   | 200 (28.2)                   | 146 (26.3)                    | 1.0 (ref)                | 161 (31.3)                   | 137 (23.0)                    | 1.0 (ref)     | 44 (19.4)                                 | 46 (13.4)                                    | 1.0 (ref)     |
| HRT only                 | 107 (15.1)                   | 123 (22.2)                    | 1.4 (1.0-1.9)            | 75 (14.6)                    | 63 (10.6)                     | 1.0 (0.7-1.5) | 5 (2.2)                                   | 11 (3.2)                                     | 2.1 (0.7-6.6) |
| OC only                  | 278 (39.2)                   | 143 (25.8)                    | 1.2 (0.9-1.7)            | 204 (39.7)                   | 294 (49.4)                    | 1.3 (0.9-1.8) | 154 (67.8)                                | 252 (73.3)                                   | 1.6 (1.0-2.5) |
| Both OC and HRT          | 125 (17.6)                   | 143 (25.8)                    | 1.9 (1.4-2.7)            | 74 (14.4)                    | 101 (17.0)                    | 1.4 (1.0-2.1) | 24 (10.6)                                 | 35 (10.2)                                    | 1.3 (0.7-2.7) |

a. Early-onset BCC defined as age  $\leq$  50 at time of diagnosis.

b. Odds ratios and 95% confidence intervals adjusted for reference age and skin sensitivity to first solar exposure.

Supplemental Table 3. Odds ratios (95% CI) of keratinocyte cancers in relation to hormone replacement therapy use by subgroups according to body mass index (BMI)

|                                    | SCC               |                    |                          | BCC               |                    |               |
|------------------------------------|-------------------|--------------------|--------------------------|-------------------|--------------------|---------------|
|                                    | controls<br>N (%) | SCC cases<br>N (%) | OR (95% CI) <sup>a</sup> | controls<br>N (%) | BCC cases<br>N (%) | OR (95% CI)   |
| <b>Hormone Replacement Therapy</b> |                   |                    |                          |                   |                    |               |
| <b>Normal BMI</b>                  |                   |                    |                          |                   |                    |               |
| Non user                           | 108 (55.7)        | 91 (42.7)          | 1.0 (ref)                | 65 (55.1)         | 87 (55.1)          | 1.0 (ref)     |
| Ever user                          | 86 (44.3)         | 122 (57.3)         | 1.5 (1.0-2.3)            | 53 (44.9)         | 71 (44.9)          | 1.0 (0.6-1.6) |
| <b>Overweight</b>                  |                   |                    |                          |                   |                    |               |
| Non user                           | 63 (54.3)         | 79 (57.7)          | 1.0 (ref)                | 42 (57.5)         | 33 (55.9)          | 1.0 (ref)     |
| Ever user                          | 53 (45.7)         | 58 (42.3)          | 0.9 (0.5-1.5)            | 31 (42.5)         | 26 (44.1)          | 1.0 (0.5-2.0) |
| <b>Obese</b>                       |                   |                    |                          |                   |                    |               |
| Non user                           | 78 (64.5)         | 45 (47.9)          | 1.0 (ref)                | 41 (71.9)         | 26 (63.4)          | 1.0 (ref)     |
| Ever user                          | 43 (35.5)         | 49 (52.1)          | 2.0 (1.1-3.4)            | 16 (28.1)         | 15 (36.6)          | 1.4 (0.6-3.4) |
| <b>Duration of HRT use</b>         |                   |                    |                          |                   |                    |               |
| <b>Normal BMI</b>                  |                   |                    |                          |                   |                    |               |
| Non user                           | 108 (56.3)        | 91 (43.3)          | 1.0 (ref)                | 65 (56.0)         | 87 (55.4)          | 1.0 (ref)     |
| > 0- ≤ 5 yrs.                      | 30 (15.6)         | 30 (14.3)          | 1.3 (0.7-2.4)            | 20 (17.2)         | 34 (21.7)          | 1.1 (0.6-2.1) |
| > 5 yrs.                           | 4 (28.1)          | 89 (42.4)          | 1.7 (1.0-2.6)            | 31 (26.7)         | 36 (22.9)          | 0.9 (0.5-1.6) |
| <b>Overweight</b>                  |                   |                    |                          |                   |                    |               |
| Non user                           | 63 (54.3)         | 79 (58.5)          | 1.0 (ref)                | 42 (57.5)         | 33 (57.9)          | 1.0 (ref)     |
| > 0- ≤ 5 yrs.                      | 18 (15.5)         | 12 (8.9)           | 0.6 (0.3-1.3)            | 10 (13.7)         | 9 (15.8)           | 0.9 (0.3-2.6) |
| > 5 yrs.                           | 35 (30.2)         | 44 (32.6)          | 1.0 (0.6-1.7)            | 21 (28.8)         | 15 (26.3)          | 0.9 (0.4-2.0) |
| <b>Obese</b>                       |                   |                    |                          |                   |                    |               |
| Non user                           | 78 (64.5)         | 45 (47.9)          | 1.0 (ref)                | 41 (71.9)         | 26 (63.4)          | 1.0 (ref)     |
| > 5 yrs.                           | 16 (13.2)         | 18 (19.1)          | 2.0 (0.9-4.4)            | 6 (10.5)          | 5 (12.2)           | 1.1 (0.3-4.1) |
| > 0- ≤ 5 yrs.                      | 27 (22.3)         | 31 (33.0)          | 1.9 (1.0-3.7)            | 10 (17.5)         | 10 (24.4)          | 1.6 (0.6-4.6) |

a. Odds ratios and 95% confidence intervals adjusted for reference age and skin sensitivity to first solar exposure.

Supplemental Table 4. Case-case odds ratios (95% CI) of keratinocyte cancers in relation to oral contraceptive and hormone replacement therapy use by subgroups according to degree of solar elastosis in skin adjacent to the tumor

| Solar elastosis             | SCC cases              |                 |                          | BCC cases              |                 |               | Early-onset BCC cases <sup>a</sup> |                 |                |
|-----------------------------|------------------------|-----------------|--------------------------|------------------------|-----------------|---------------|------------------------------------|-----------------|----------------|
|                             | None-moderate<br>N (%) | Severe<br>N (%) | OR (95% CI) <sup>b</sup> | None-moderate<br>N (%) | Severe<br>N (%) | OR (95% CI)   | None-moderate<br>N (%)             | Severe<br>N (%) | OR (95% CI)    |
| Oral contraceptive use      |                        |                 |                          |                        |                 |               |                                    |                 |                |
| Non user                    | 35 (34.7)              | 128 (53.6)      | 1.0 (ref)                | 32 (23.7)              | 72 (35.6)       | 1.0 (ref)     | 19 (18.3)                          | 18 (17.8)       | 1.0 (ref)      |
| Any user                    | 66 (65.3)              | 111 (46.4)      | 0.4 (0.3-0.7)            | 103 (76.3)             | 130 (64.4)      | 0.6 (0.3-0.9) | 85 (81.7)                          | 83 (82.2)       | 1.1 (0.5-2.2)  |
| Hormone replacement therapy |                        |                 |                          |                        |                 |               |                                    |                 |                |
| Non user                    | 49 (48.5)              | 121 (50.4)      | 1.0 (ref)                | 106(77.9)              | 138(67.6)       | 1.0 (ref)     | 94 (88.7)                          | 88 (86.3)       | 1.0 (ref)      |
| Any user                    | 52 (51.5)              | 119 (49.6)      | 0.9 (0.6-1.5)            | 30 (22.1)              | 66 (32.4)       | 1.7 (1.0-2.8) | 12 (11.3)                          | 14 (13.7)       | 1.2 (0.5-2.8)  |
| Exclusive estrogen          | 30 (38.0)              | 72 (37.3)       | 0.9 (0.5-1.6)            | 7 (13.8)               | 37 (21.1)       | 1.6 (0.9-3.1) | 6 (6.0)                            | 5 (5.4)         | 0.8 (0.2-2.8)  |
| Estrogen + progestin        | 13 (21.0)              | 36 (22.9)       | 1.2 (0.6-2.5)            | 7 (6.2)                | 21 (13.2)       | 2.3 (0.9-5.7) | 2 (2.1)                            | 5 (5.4)         | 2.9 (0.5-15.7) |

a. Early-onset BCC defined as age  $\leq$  50 at time of diagnosis.

b. Odds ratios and 95% confidence intervals adjusted for reference age and skin sensitivity to first solar exposure.

Supplemental Table 5. Case-case odds ratios (95% CI) of squamous cell carcinoma (SCC) in relation to oral contraceptive and hormone replacement therapy use by subgroups according to presence of actinic keratosis in skin adjacent to the tumor

|                             | SCC cases                |                           |                          |
|-----------------------------|--------------------------|---------------------------|--------------------------|
|                             | Actinic keratosis absent | Actinic keratosis present | OR (95% CI) <sup>a</sup> |
|                             | N (%)                    | N (%)                     |                          |
| Oral contraceptive use      |                          |                           |                          |
| Non user                    | 100 (41.8)               | 73 (52.1)                 | 1.0 (ref)                |
| Any user                    | 139 (58.2)               | 67 (47.9)                 | 0.7 (0.4-1.0)            |
| Hormone replacement therapy |                          |                           |                          |
| Non user                    | 124 (51.7)               | 60 (42.9)                 | 1.0 (ref)                |
| Any user                    | 116 (48.3)               | 80 (57.1)                 | 1.5 (1.0-2.2)            |
| Any estrogen                | 101 (44.9)               | 73 (54.9)                 | 1.6 (1.0-2.4)            |
| Exclusive estrogen          | 63 (33.7)                | 51 (45.9)                 | 1.7 (1.0-2.7)            |
| Estrogen + progestin        | 38 (23.5)                | 22 (26.8)                 | 1.3 (0.7-2.4)            |

a. Odds ratios and 95% confidence intervals adjusted for reference age and skin sensitivity to first solar exposure.

Supplemental Table 6. Case-case odd ratios (95% CI) of keratinocyte cancers in relation to oral contraceptive and hormone replacement therapy use by subgroups according to anatomic site

| Anatomic site               | SCC cases       |               |                          | BCC cases       |               |               | Early-onset BCC cases <sup>a</sup> |               |               |
|-----------------------------|-----------------|---------------|--------------------------|-----------------|---------------|---------------|------------------------------------|---------------|---------------|
|                             | Trunk and limbs | Head and neck | OR (95% CI) <sup>b</sup> | Trunk and limbs | Head and neck | OR (95% CI)   | Trunk and limbs                    | Head and neck | OR (95% CI)   |
|                             | N (%)           | N (%)         |                          | N (%)           | N (%)         |               | N (%)                              | N (%)         |               |
| Oral contraceptive use      |                 |               |                          |                 |               |               |                                    |               |               |
| Non user                    | 151 (47.2)      | 118 (50.2)    | 1.0 (ref)                | 76 (31.4)       | 123 (34.9)    | 1.0 (ref)     | 28 (19.6)                          | 29 (14.5)     | 1.0 (ref)     |
| Any user                    | 169 (52.8)      | 117 (49.8)    | 0.9 (0.6-1.3)            | 166 (68.6)      | 229 (65.1)    | 0.9 (0.6-1.2) | 115 (80.4)                         | 171 (85.5)    | 1.5 (0.8-2.6) |
| Hormone replacement therapy |                 |               |                          |                 |               |               |                                    |               |               |
| Non user                    | 167 (52.0)      | 123 (52.3)    | 1.0 (ref)                | 172 (70.5)      | 265 (74.2)    | 1.0 (ref)     | 127 (88.2)                         | 174 (86.1)    | 1.0 (ref)     |
| Any user                    | 154 (48.0)      | 112 (47.7)    | 1.0 (0.7-1.4)            | 72 (29.5)       | 92 (25.8)     | 0.8 (0.6-1.2) | 17 (11.8)                          | 28 (13.9)     | 1.2 (0.6-2.3) |
| Any estrogen                | 136 (44.9)      | 100 (44.8)    | 1.0 (0.7-1.4)            | 61 (26.2)       | 81 (23.4)     | 0.9 (0.6-1.3) | 12 (8.6)                           | 20 (10.3)     | 1.2 (0.6-2.5) |
| Exclusive estrogen          | 95 (36.3)       | 64 (34.2)     | 0.9 (0.6-1.3)            | 44 (20.4)       | 57 (17.7)     | 0.8 (0.5-1.3) | 8 (5.9)                            | 10 (5.4)      | 0.9 (0.3-2.4) |
| Estrogen + progestin        | 41 (19.7)       | 36 (22.6)     | 1.2 (0.7-2.0)            | 17 (9.0)        | 24 (8.3)      | 1.0 (0.5-1.9) | 4 (3.1)                            | 10 (5.4)      | 1.8 (0.6-6.0) |

a. Early-onset BCC defined as age  $\leq$  50 at time of diagnosis.

b. Odds ratios and 95% confidence intervals adjusted for reference age and skin sensitivity to first solar exposure
